# Supplementary material for: A High-Throughput Approach for Identification of Nontuberculous Mycobacteria in Drinking Water Reveals Relationship between Water Age and Mycobacterium avium
Source: PubMed Central journal article supplement (PMC5821076; doi:10.1128/mbio.02354-17), 2018-02-13
Supplement: mbo001183725s1.pdf [file mbo001183725s1.pdf]

## SI-1. Extraction efficiency calculation

$$\text{DNA (pg)} = \text{genome size (bp)} / (0.978 \times 10^9) \text{ (pg/bp)}$$

### Genome size (bp)

|                     |           |
|---------------------|-----------|
| <i>E. coli</i>      | 4,585,620 |
| <i>M. abscessus</i> | 5,090,491 |

### (A) Calculated DNA content of one bacterial cell

|                     |        |    |
|---------------------|--------|----|
| <i>E. coli</i>      | 0.0047 | pg |
| <i>M. abscessus</i> | 0.0052 | pg |

### (B) From DAPI

### Theoretical DNA yield (A x B)

|                     |          |         | pg       | ng    |
|---------------------|----------|---------|----------|-------|
| <i>E. coli</i>      | 1.64E+07 | cells/L | 76895.88 | 76.90 |
| <i>M. abscessus</i> | 1.36E+07 | cells/L | 70788.01 | 70.79 |

| Average extracted DNA (ng/μl) |      | Standard deviation (ng/μl) | Average total extracted DNA (ng) from 100 μl elution | Standard deviation (ng) from 100 μl elution |
|-------------------------------|------|----------------------------|------------------------------------------------------|---------------------------------------------|
| <i>E. coli</i>                | 0.60 | 0.08                       | 60.40                                                | 7.72                                        |
| <i>M. abscessus</i>           | 0.19 | 0.04                       | 18.90                                                | 4.40                                        |

### Average extraction efficiency

### Standard deviation

|                     |        |       |
|---------------------|--------|-------|
| <i>E. coli</i>      | 78.55% | 9.53% |
| <i>M. abscessus</i> | 26.70% | 6.34% |
