# Supplementary material for: A High-Throughput Approach for Identification of Nontuberculous Mycobacteria in Drinking Water Reveals Relationship between Water Age and Mycobacterium avium
Source: PubMed Central journal article supplement (PMC5821076; doi:10.1128/mbio.02354-17), 2018-02-13
Supplement: mbo001183725s2.pdf [file mbo001183725s2.pdf]

SI-2. *rpoB* and PacBio primers and thermocycling conditions

| Use                                   | Primer Name            | Sequence (5' to 3')                      |
|---------------------------------------|------------------------|------------------------------------------|
| Forward Degenerate <i>rpoB</i> Primer |                        | TCCGAYGAGGTGCTSGCNGA                     |
| Reverse Degenerate <i>rpoB</i> Primer |                        | SGAYTTGATGGTCARCAGYTCC                   |
| PacBio round 1<br>Forward Primer      | myco_rpoB_2572_M13_f4  | TGTA AACGACGGCCAGTCCGACGAGGTGCTCGCTGA    |
| PacBio round 1<br>Forward Primer      | myco_rpoB_2572_M13_f6  | TGTA AACGACGGCCAGTCCGACGAGGTGCTGGCCGA    |
| PacBio round 1<br>Forward Primer      | myco_rpoB_2572_M13_f8  | TGTA AACGACGGCCAGTCCGACGAGGTGCTGGCTGA    |
| PacBio round 1<br>Forward Primer      | myco_rpoB_2572_M13_f10 | TGTA AACGACGGCCAGTCCGATGAGGTGCTCGCCGA    |
| PacBio round 1<br>Forward Primer      | myco_rpoB_2572_M13_f13 | TGTA AACGACGGCCAGTCCGATGAGGTGCTGGCAGA    |
| PacBio round 1<br>Forward Primer      | myco_rpoB_2572_M13_f14 | TGTA AACGACGGCCAGTCCGATGAGGTGCTGGCCGA    |
| PacBio round 1<br>Reverse Primer      | myco_rpoB_3864_M13_r1  | CAGGAAACAGCTATGACCGGACTTGATGGTCAACAGCTCC |
| PacBio round 1<br>Reverse Primer      | myco_rpoB_3864_M13_r3  | CAGGAAACAGCTATGACCGGACTTGATGGTCAGCAGCTCC |
| PacBio round 1<br>Reverse Primer      | myco_rpoB_3864_M13_r5  | CAGGAAACAGCTATGACCGGATTTGATGGTCAACAGCTCC |
| PacBio round 1<br>Reverse Primer      | myco_rpoB_3864_M13_r9  | CAGGAAACAGCTATGACCGGACTTGATGGTCAACAGCTCC |
| <b>Round 2 Primers - Universal</b>    |                        |                                          |
| PacBio round 2<br>Forward Primer      | Forward_Bar01_M13      | TCAGACGATGCGTCATTGTAAACGACGGCCAGT        |
| PacBio round 2<br>Forward Primer      | Forward_Bar02_M13      | CTATACATGACTCTGCTGTAAACGACGGCCAGT        |
| PacBio round 2<br>Forward Primer      | Forward_Bar03_M13      | CGTCTATATACGTATATGTAAACGACGGCCAGT        |
| PacBio round 2<br>Forward Primer      | Forward_Bar04_M13      | TGTGTATCAGTACATGTGTAAACGACGGCCAGT        |
| PacBio round 2<br>Forward Primer      | Forward_Bar05_M13      | ACACGCATGACACACTTGTAAACGACGGCCAGT        |
| PacBio round 2<br>Forward Primer      | Forward_Bar06_M13      | GATCTCTACTATATGCTGTAAACGACGGCCAGT        |
| PacBio round 2<br>Forward Primer      | Forward_Bar07_M13      | GCGTATATCTCATGCGTGTAAACGACGGCCAGT        |
| PacBio round 2<br>Forward Primer      | Forward_Bar08_M13      | ATGATGTGCTACATCTTGTAAACGACGGCCAGT        |
| PacBio round 2<br>Reverse Primer      | Reverse_Bar01_M13      | CTATAGACACAGCGATCAGGAAACAGCTATGACC       |

## SI-2. *rpoB* and PacBio primers and thermocycling conditions

|                                  |                   |                                           |
|----------------------------------|-------------------|-------------------------------------------|
| PacBio round 2<br>Reverse Primer | Reverse_Bar02_M13 | <b>CACGCTATCAGTGAGACAGGAAACAGCTATGACC</b> |
| PacBio round 2<br>Reverse Primer | Reverse_Bar03_M13 | <b>TACATGATAGACGACACAGGAAACAGCTATGACC</b> |
| PacBio round 2<br>Reverse Primer | Reverse_Bar04_M13 | <b>GATGAGATCTCGTGTGCAGGAAACAGCTATGACC</b> |
| PacBio round 2<br>Reverse Primer | Reverse_Bar05_M13 | <b>AGTATCATGTGTATCTCAGGAAACAGCTATGACC</b> |
| PacBio round 2<br>Reverse Primer | Reverse_Bar06_M13 | <b>GCACGTCGTATATCGACAGGAAACAGCTATGACC</b> |
| PacBio round 2<br>Reverse Primer | Reverse_Bar07_M13 | <b>ATATGTGCAGTCGAGACAGGAAACAGCTATGACC</b> |

Bold and underlined bases in the original degenerate primers represent the changes made from the original Macheras *et al.* (2011) primers.

Blue text is the part of the primer that amplifies the *rpoB* gene.

16 bp PacBio barcodes are presented in red.

### PCR THERMOCYCLING CONDITIONS

#### PCR1

|               |   |           |
|---------------|---|-----------|
| 98°C x 10 s   | } | 2 cycles  |
| 98°C x 1 s    |   |           |
| 54°C x 5 s    |   |           |
| 72°C x 14 s   |   |           |
| 98°C x 1 s    | } | 22 cycles |
| 72°C x 5 s    |   |           |
| 72°C x 14 s   |   |           |
| 72°C x 1min   |   |           |
| 4°C x forever |   |           |

#### PCR2

|               |   |           |
|---------------|---|-----------|
| 98°C x 10 s   | } | 1 cycle   |
| 98°C x 1 s    |   |           |
| 52°C x 5 s    | } | 24 cycles |
| 72°C x 14 s   |   |           |
| 98°C x 1 s    |   |           |
| 72°C x 5 s    |   |           |
| 72°C x 14 s   |   |           |
| 72°C x 1 min  |   |           |
| 4°C x forever |   |           |
