# Supplementary material for: A High-Throughput Approach for Identification of Nontuberculous Mycobacteria in Drinking Water Reveals Relationship between Water Age and Mycobacterium avium
Source: PubMed Central journal article supplement (PMC5821076; doi:10.1128/mbio.02354-17), 2018-02-13
Supplement: mbo001183725s5.pdf [file mbo001183725s5.pdf]

## SI-5. DNA extraction procedure

**Lysis Buffer** – *Modified from Hill et al., Universal Nucleic Acid Extraction lysis buffer (UNEX)*

Using pre-baked glassware to remove nucleases for making Buffer A

### **BUFFER A**

Final concentrations in buffer

2.25 M Guanidinium thiocyanate (GITC) in Tris (10 mM)- EDTA (1 mM) TE buffer (pH 8)

0.14 M Sodium Acetate

0.24 M Sodium chloride

0.4 % Sodium Sulphite

0.2 % Dithioerythritol (DTE)

### Steps

- Make 5 % DTE solution
  - Make 10 % sodium sulphite solution
1. Make 100 ml TE buffer solution
  2. Add and dissolve 66 g of GITC into the buffer
    - a. Dissolve by heating in a water bath at 50 °C for 30 min, swirl every 5 min
  3. Add 12 ml of 5 M sodium chloride
  4. Add 12 ml of 3 M sodium acetate
  5. Add 10 ml of 5 % DTE
  6. Add 10 ml of sodium sulphite

### **CELL LYSIS PROCEDURE FOR EIGHT EXTRACTIONS**

1. Take the previously frozen 0.2 µM membrane which the water sample was filtered through out of the freezer to thaw slightly. These should be in 2 ml screw-cap tubes.
2. Heat 5123.7 µl of Buffer A in a water bath at 65 °C (warm for at least 10 min); heating the buffer to 65 °C is necessary to ensure that the SDS and Tween20 do not precipitate.
3. Add 500 µl of phenol-chloroform-isoamyl (25:24:1) pH 8 to each 2 ml screw-cap tube containing filtered biomass and vortex
4. Remove Buffer A from the water bath and
  - a. Add 25.6 µl 20 % SDS
  - b. Add 2 µl 20 % Tween20
  - c. Add 48.7 µl proteinase K (12.9667 U/ml/min)
5. Add 600 µl of Buffer A containing the SDS, Tween20 and Proteinase K to each 2 ml screw-cap tube from step 3.
6. Vortex briefly and then incubate at 65 °C for 15 min
7. Add 0.5 g pre-baked zirconium bead (0.1 mm) and vortex
8. Bead-beat for 5 min

## SI-5. DNA extraction procedure

9. Centrifuge at 13,000 g for 5 min
10. Transfer the aqueous phase to a new microcentrifuge tube
11. Add 500  $\mu$ l of chloroform-isoamyl alcohol (24:1)
12. Mix by inverting
13. Centrifuge at 13,000 g for 5 min
14. Transfer aqueous phase to a new microcentrifuge tube
15. Precipitate DNA by adding 300  $\mu$ l of 7.5M ammonium acetate (assuming your lysate is 600  $\mu$ l, as a final concentration of 2.5M is needed)
16. Add 600  $\mu$ l of isopropanol (assuming your lysate is 600  $\mu$ l)
17. Add 3.3  $\mu$ l of Glycoblue (15mg/ml)
18. Incubate at -20 °C overnight
19. Centrifuge for 30 min at 13,000 g
20. Remove supernatant (DNA should be pelleted to the back wall)
21. Add 500  $\mu$ l of 80 % ethanol (v/v) to wash the pellet
22. Centrifuge at 13,000 g for 30 min
23. Remove ethanol and let the tube to air-dry
24. Resuspend the pellet in 30 – 50  $\mu$ l of DNA-free water
25. For best results leave the pellet to dissolve into the water by leaving it at 4 °C overnight
