# Supplementary material for: A High-Throughput Approach for Identification of Nontuberculous Mycobacteria in Drinking Water Reveals Relationship between Water Age and Mycobacterium avium
Source: PubMed Central journal article supplement (PMC5821076; doi:10.1128/mbio.02354-17), 2018-02-13
Supplement: mbo001183725s6.pdf [file mbo001183725s6.pdf]

## SI-6: qPCR primers and thermocycling conditions

| Target                                | Forward (5'-3')                 | Reverse (5'-3')                 | Amplicon size | Annealing temp (°C) | Ref. |
|---------------------------------------|---------------------------------|---------------------------------|---------------|---------------------|------|
| Mycobacteria<br>( <i>atpE</i> gene)   | FatpE:<br>CGGYGCCGGTATCGGYGA    | RatpE:<br>CGAAGACGAACARSGCCAT   | 182 bp        | 59.6                | 1    |
| Total bacteria<br>(16S rRNA gene)     | Eub338:<br>ACTCCTACGGGAGGCAG    | Eub518:<br>ATTACCGCGGCTGCTGG    | 200 bp        | 54                  | 2    |
| <i>Pseudomonas</i><br>(16S rRNA gene) | PA-GS-F:<br>GACGGGTGAGTAATGCCTA | PA-GS-R:<br>CACTGGTGTTCCTTCTATA | 618 bp        | 56                  | 3    |

<sup>1</sup> Radomski N, Roguet A, Lucas FS, Veyrier FJ, Cambau E, Accrombessi H, Moilleron R, Behr MA, Moulin L. 2013. *atpE* gene as a new useful specific molecular target to quantify *Mycobacterium* in environmental samples, BMC Microbiol 13:277-290.

<sup>2</sup> Haig SJ, Quince C, Davies RL Dorea CC and Collins G. 2014. Replicating the microbial community and water quality performance of full-scale slow sand filters in laboratory-scale filters. Water Res 61:141–151.

<sup>3</sup> Spilker T, Coenye T, Vandamme P, LiPuma JJ. 2004. PCR-based assay for differentiation of *Pseudomonas aeruginosa* from other *Pseudomonas* species recovered from cystic fibrosis patients. J Clin Microbiol 42:2074–2079.
