# Supplementary material for: A High-Throughput Approach for Identification of Nontuberculous Mycobacteria in Drinking Water Reveals Relationship between Water Age and Mycobacterium avium
Source: mBio. 2018 Feb 13;9(1):e02354-17. doi: 10.1128/mBio.02354-17 (PMC5821076; doi:10.1128/mBio.02354-17)
Supplement: TEXT S3 [file mbo001183725s3.pdf]

SI-3. Combined qPCR and PacBio data

| Sample ID | Stagnation time (h) | Residence time in DS (h) | Combined water age (h) | Free chlorine (mg / L) | Total chlorine (mg / L) | Monochloramine (mg / L) | Ct (mg min / L) | Number of NTM OTUs | Total NTM (atpE copies/L) | Concentration of NTM based on combining qPCR and PacBio results (/ L ) |                              |                                         |                             |                             |                             |                    |                       |                          |                          |                                |                                |                     |               |               |                          |
|-----------|---------------------|--------------------------|------------------------|------------------------|-------------------------|-------------------------|-----------------|--------------------|---------------------------|------------------------------------------------------------------------|------------------------------|-----------------------------------------|-----------------------------|-----------------------------|-----------------------------|--------------------|-----------------------|--------------------------|--------------------------|--------------------------------|--------------------------------|---------------------|---------------|---------------|--------------------------|
|           |                     |                          |                        |                        |                         |                         |                 |                    |                           | <i>M. abscessus</i>                                                    | <i>M. avium subsp. avium</i> | <i>M. avium subsp. paratuberculosis</i> | <i>M. chelonae</i> strain 1 | <i>M. chelonae</i> strain 2 | <i>M. chelonae</i> strain 3 | <i>M. gordonia</i> | <i>M. hominissuis</i> | <i>M. indicus pranii</i> | <i>M. intracellulare</i> | <i>M. mucogenicum</i> strain 1 | <i>M. mucogenicum</i> strain 2 | <i>M. phocaicum</i> | M. sp. YC-RL4 | M. sp. QIA-37 | Unidentified mycobacteri |
| PP8       | 7.50                | 11.50                    | 19.00                  | 0.14                   | 1.60                    | 1.46                    | 1667.82         | 7                  | 6.17E+06                  | 3.01E+04                                                               | 2.47E+05                     | 0.00E+00                                | 0.00E+00                    | 3.25E+06                    | 0.00E+00                    | 0.00E+00           | 0.00E+00              | 1.00E+04                 | 0.00E+00                 | 0.00E+00                       | 2.50E+06                       | 0.00E+00            | 0.00E+00      | 4.84E+04      | 7.69E+04                 |
| PP11      | 7.00                | 12.50                    | 19.50                  | 0.11                   | 2.20                    | 2.10                    | 2451.15         | 7                  | 7.41E+06                  | 0.00E+00                                                               | 2.81E+06                     | 6.71E+04                                | 0.00E+00                    | 4.08E+06                    | 0.00E+00                    | 0.00E+00           | 0.00E+00              | 0.00E+00                 | 0.00E+00                 | 3.27E+05                       | 0.00E+00                       | 0.00E+00            | 2.01E+04      | 1.34E+04      | 8.50E+04                 |
| PP14      | 10.00               | 10.50                    | 20.50                  | 0.04                   | 1.47                    | 1.43                    | 1761.36         | 10                 | 6.61E+06                  | 4.87E+05                                                               | 1.30E+06                     | 5.69E+04                                | 0.00E+00                    | 4.41E+06                    | 2.67E+05                    | 0.00E+00           | 6.68E+03              | 5.00E+04                 | 1.00E+04                 | 0.00E+00                       | 3.34E+03                       | 0.00E+00            | 0.00E+00      | 1.65E+04      | 0.00E+00                 |
| PP9       | 8.00                | 12.50                    | 21.00                  | 0.09                   | 2.60                    | 2.51                    | 3162.60         | 9                  | 7.24E+06                  | 1.84E+04                                                               | 1.15E+06                     | 9.18E+03                                | 0.00E+00                    | 5.85E+06                    | 0.00E+00                    | 0.00E+00           | 0.00E+00              | 6.12E+03                 | 0.00E+00                 | 0.00E+00                       | 3.07E+03                       | 4.59E+04            | 0.00E+00      | 9.18E+03      | 1.50E+05                 |
| PP10      | 10.50               | 11.00                    | 21.50                  | 1.64                   | 2.50                    | 0.86                    | 1110.69         | 8                  | 6.92E+06                  | 2.93E+06                                                               | 9.27E+05                     | 1.02E+04                                | 0.00E+00                    | 2.93E+06                    | 0.00E+00                    | 0.00E+00           | 0.00E+00              | 0.00E+00                 | 0.00E+00                 | 7.75E+04                       | 0.00E+00                       | 0.00E+00            | 3.43E+04      | 2.55E+03      | 2.55E+03                 |
| PP12      | 6.50                | 19.50                    | 26.50                  | 0.08                   | 2.10                    | 2.03                    | 3219.75         | 9                  | 6.17E+06                  | 1.41E+06                                                               | 1.43E+06                     | 8.47E+04                                | 0.00E+00                    | 2.82E+06                    | 0.00E+00                    | 7.41E+04           | 5.83E+04              | 0.00E+00                 | 0.00E+00                 | 0.00E+00                       | 1.27E+05                       | 7.41E+04            | 0.00E+00      | 9.00E+04      | 0.00E+00                 |
| PP15      | 6.50                | 21.00                    | 27.50                  | 1.39                   | 2.30                    | 0.91                    | 1494.90         | 7                  | 5.25E+06                  | 6.17E+05                                                               | 7.08E+05                     | 8.41E+03                                | 0.00E+00                    | 3.26E+06                    | 6.12E+05                    | 0.00E+00           | 0.00E+00              | 0.00E+00                 | 0.00E+00                 | 0.00E+00                       | 0.00E+00                       | 0.00E+00            | 0.00E+00      | 1.35E+04      | 2.69E+04                 |
| PP3       | 6.00                | 25.00                    | 31.00                  | 0.98                   | 2.00                    | 1.03                    | 1906.50         | 8                  | 8.34E+06                  | 1.41E+05                                                               | 7.24E+06                     | 9.92E+04                                | 0.00E+00                    | 5.07E+04                    | 0.00E+00                    | 0.00E+00           | 0.00E+00              | 3.67E+05                 | 0.00E+00                 | 0.00E+00                       | 0.00E+00                       | 3.91E+05            | 0.00E+00      | 8.45E+03      | 4.01E+04                 |
| PP4       | 6.50                | 25.00                    | 31.50                  | 0.18                   | 1.90                    | 1.72                    | 3245.13         | 8                  | 8.54E+06                  | 0.00E+00                                                               | 7.57E+06                     | 7.63E+04                                | 0.00E+00                    | 4.85E+04                    | 0.00E+00                    | 3.33E+05           | 0.00E+00              | 1.66E+05                 | 0.00E+00                 | 0.00E+00                       | 0.00E+00                       | 2.36E+05            | 0.00E+00      | 1.62E+04      | 9.25E+04                 |
| PP13      | 6.00                | 26.00                    | 32.00                  | 0.04                   | 2.30                    | 2.26                    | 4339.20         | 9                  | 5.37E+06                  | 3.96E+03                                                               | 5.28E+06                     | 3.96E+03                                | 2.38E+04                    | 1.98E+04                    | 0.00E+00                    | 0.00E+00           | 3.96E+03              | 0.00E+00                 | 0.00E+00                 | 0.00E+00                       | 1.79E+04                       | 3.96E+03            | 0.00E+00      | 0.00E+00      | 9.92E+03                 |
| PP2       | 6.00                | 38.00                    | 44.00                  | 0.00                   | 0.50                    | 0.50                    | 1320.00         | 4                  | 7.08E+06                  | 4.22E+05                                                               | 6.51E+06                     | 2.27E+04                                | 0.00E+00                    | 0.00E+00                    | 0.00E+00                    | 0.00E+00           | 0.00E+00              | 0.00E+00                 | 0.00E+00                 | 0.00E+00                       | 0.00E+00                       | 0.00E+00            | 0.00E+00      | 0.00E+00      | 1.21E+05                 |
| PP7       | 6.00                | 42.00                    | 48.00                  | 0.16                   | 2.70                    | 2.54                    | 7315.20         | 6                  | 6.31E+06                  | 3.74E+04                                                               | 5.54E+06                     | 3.75E+03                                | 0.00E+00                    | 6.92E+05                    | 0.00E+00                    | 0.00E+00           | 0.00E+00              | 0.00E+00                 | 0.00E+00                 | 0.00E+00                       | 0.00E+00                       | 0.00E+00            | 0.00E+00      | 5.61E+03      | 2.81E+04                 |
| PP1       | 6.00                | 54.00                    | 60.00                  | 1.26                   | 2.90                    | 1.64                    | 5896.80         | 4                  | 5.75E+06                  | 0.00E+00                                                               | 5.48E+06                     | 4.00E+04                                | 0.00E+00                    | 0.00E+00                    | 0.00E+00                    | 0.00E+00           | 0.00E+00              | 2.23E+05                 | 0.00E+00                 | 0.00E+00                       | 0.00E+00                       | 0.00E+00            | 0.00E+00      | 4.03E+03      | 0.00E+00                 |
| PP6       | 6.50                | 102.00                   | 108.50                 | 0.42                   | 2.20                    | 1.78                    | 11613.84        | 7                  | 7.24E+06                  | 0.00E+00                                                               | 7.08E+06                     | 1.81E+04                                | 0.00E+00                    | 2.21E+04                    | 0.00E+00                    | 0.00E+00           | 0.00E+00              | 5.22E+04                 | 0.00E+00                 | 0.00E+00                       | 0.00E+00                       | 5.42E+04            | 0.00E+00      | 4.02E+03      | 8.03E+03                 |
| PP5       | 13.00               | 113.00                   | 126.00                 | 0.89                   | 1.30                    | 0.41                    | 3069.36         | 5                  | 9.11E+06                  | 0.00E+00                                                               | 8.91E+06                     | 2.88E+04                                | 0.00E+00                    | 0.00E+00                    | 3.77E+04                    | 0.00E+00           | 0.00E+00              | 0.00E+00                 | 1.11E+04                 | 0.00E+00                       | 0.00E+00                       | 0.00E+00            | 0.00E+00      | 0.00E+00      | 1.15E+05                 |
